# Supplementary material
Source: HighWire-hosted journal article supplement (https://www.cmajopen.ca/highwire/filestream/81313/field_highwire_adjunct_files/1/2019-0021-2-at.pdf)

**Appendix 2 (as provided by the authors): Prescriptions per prescriber for opioid analgesics prescribed by dentists and dispensed to persons under 18y in community pharmacies in Nova Scotia from 2011 to 2018 by dentists' location (urban or rural)**

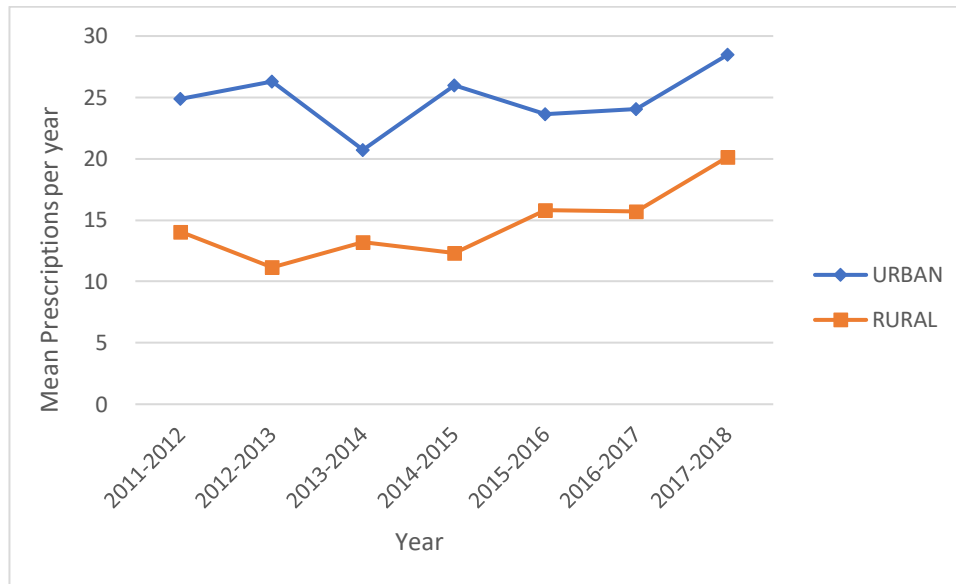

Supplement: 2019-0021-2-at.pdf [file 2019-0021-2-at.pdf]
